# Supplementary material
Source: Springer Nature journal article supplement (https://www.springermedizin.de/resource/supplementary/13024_2014_541_MOESM6_ESM.pdf/9644352)

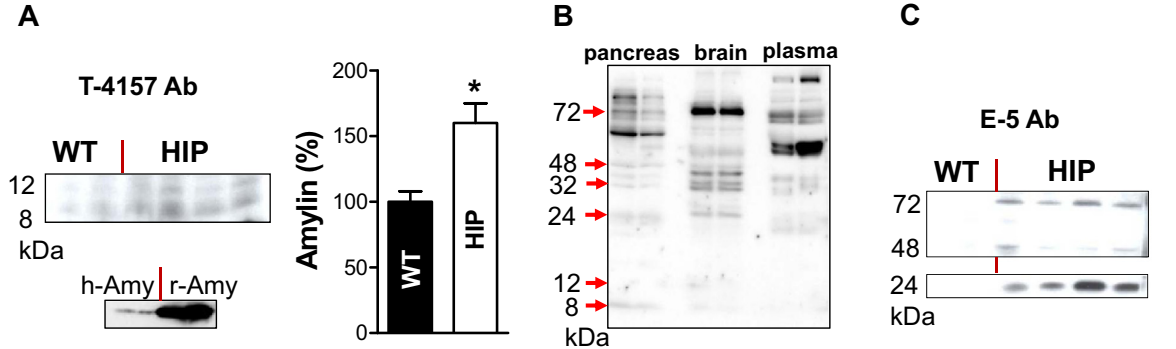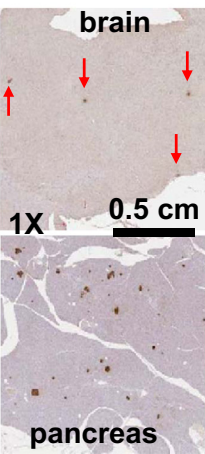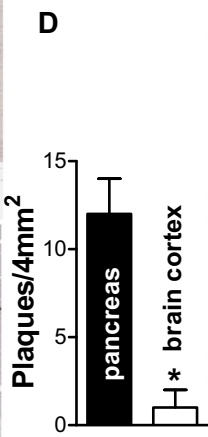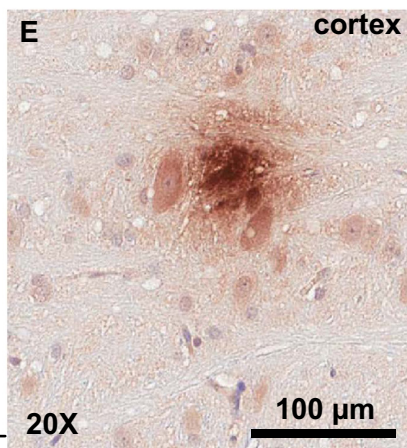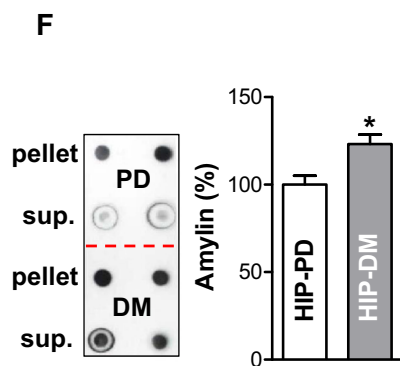

Supplement: MOESM6 [file 9644352]
